# Supplementary material for: Electrolyte tuning in dye-sensitized solar cells with N-heterocyclic carbene (NHC) iron(II) sensitizers
Source: PubMed Central journal article supplement (PMC6317411; doi:10.3762/bjnano.9.285), 2018-12-21
Supplement: Beilstein_J_Nanotechnol-09-3069-s001.pdf [file Beilstein_J_Nanotechnol-09-3069-s001.pdf]

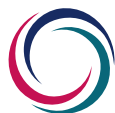

## Supporting Information

for

### **Electrolyte tuning in dye-sensitized solar cells with N-heterocyclic carbene (NHC) iron(II) sensitizers**

Mariia Karpacheva, Catherine E. Housecroft and Edwin C. Constable

*Beilstein J. Nanotechnol.* **2018**, *9*, 3069–3078. [doi:10.3762/bjnano.9.285](https://doi.org/10.3762/bjnano.9.285)

## Further experimental data

**Table S1:** Parameters for duplicate masked DSCs using electrolytes with different ionic liquids with MPN and MeCN as solvent. Measurements were made on the day of sealing the cells. Data are referenced with respect to a DSC with N719, and the Rel.  $\eta$  values and with respect to  $\eta$  for N719 set to 100%.

| Electrolyte | Cell | $J_{sc}$<br>[mA cm <sup>-2</sup> ] | $V_{oc}$ [mV] | ff [%] | $\eta$ [%] | Rel. $\eta$<br>[%] |
|-------------|------|------------------------------------|---------------|--------|------------|--------------------|
| E1          | 1    | 0.32                               | 429           | 72     | 0.10       | 1.67               |
| E1          | 2    | 0.34                               | 451           | 73     | 0.11       | 1.8                |
| E2          | 1    | 0.54                               | 427           | 71     | 0.17       | 2.8                |
| E2          | 2    | 0.54                               | 426           | 71     | 0.16       | 2.6                |
| E1a         | 1    | 0.19                               | 419           | 68     | 0.05       | 0.8                |
| E1a         | 2    | 0.24                               | 418           | 68     | 0.07       | 1.2                |
| E2a         | 1    | 0.25                               | 432           | 69     | 0.07       | 1.2                |
| E2a         | 2    | -                                  | -             | -      | -          | -                  |
| E3          | 1    | 0.24                               | 477           | 69     | 0.08       | 1.3                |
| E3          | 2    | 0.29                               | 480           | 73     | 0.10       | 1.6                |
| E4          | 1    | 0.74                               | 519           | 69     | 0.26       | 4.3                |
| E4          | 2    | 0.70                               | 529           | 70     | 0.26       | 4.3                |
| E4          | 3    | 0.90                               | 538           | 69     | 0.33       | 5.5                |
| E4          | 4    | 0.82                               | 542           | 69     | 0.31       | 5.1                |
| N719        | -    | 13.87                              | 705           | 62     | 6.02       | 100                |

**Table S2:** Parameters for duplicate masked DSCs using different additives and additive concentrations (see Table 3) in the electrolytes. Measurements were made on the day of sealing the cells. Data are referenced with respect to a DSC with N719, and the Rel.  $\eta$  values and with respect to  $\eta$  for N719 set to 100%.

| Electrolyte | Cell | $J_{sc}$<br>[mA cm <sup>-2</sup> ] | $V_{oc}$ [mV] | ff [%] | $\eta$ [%] | Rel. $\eta$ [%] |
|-------------|------|------------------------------------|---------------|--------|------------|-----------------|
| E1b         | 1    | 1.94                               | 304           | 64     | 0.38       | 6.3             |
| E1b         | 2    | 2.90                               | 261           | 47     | 0.36       | 6.0             |
| E3b         | 1    | 2.13                               | 308           | 56     | 0.37       | 6.1             |
| E3b         | 2    | 1.64                               | 343           | 62     | 0.35       | 5.8             |
| E4b         | 1    | 0.74                               | 43            | 26     | 0.01       | 0.2             |
| E4b         | 2    | 0.83                               | 50            | 27     | 0.01       | 0.2             |
| E2c         | 1    | 0.69                               | 395           | 65     | 0.18       | 2.9             |
| E2c         | 2    | 0.54                               | 393           | 64     | 0.14       | 2.3             |
| E2d         | 1    | 1.31                               | 395           | 60     | 0.31       | 5.1             |
| E2d         | 2    | 1.22                               | 358           | 58     | 0.25       | 4.2             |
| E2f         | 1    | 0.39                               | 368           | 66     | 0.09       | 2.6             |
| E2f         | 2    | 0.69                               | 387           | 67     | 0.18       | 2.9             |
| E2g         | 1    | 1.16                               | 380           | 65     | 0.29       | 4.8             |
| E2g         | 2    | 1.09                               | 372           | 66     | 0.27       | 4.5             |
| E2h         | 1    | 0.76                               | 541           | 62     | 0.26       | 4.3             |
| E2h         | 2    | 0.73                               | 518           | 64     | 0.24       | 4.0             |
| N719        | 1    | 13.87                              | 705           | 62     | 6.02       | 100             |

**Table S3:** Parameters for multiple masked DSCs using different additives and additive concentrations (see Table 3) in the electrolytes. Measurements were made on the day of sealing the cells. Data are referenced with respect to a DSC with N719, and the Rel.  $\eta$  values and with respect to  $\eta$  for N719 set to 100%.

| Electrolyte | Cell | $J_{sc}$<br>[mA cm <sup>-2</sup> ] | $V_{oc}$ [mV] | ff [%] | $\eta$ [%] | Rel. $\eta$<br>[%] |
|-------------|------|------------------------------------|---------------|--------|------------|--------------------|
| E2b         | 1    | 2.58                               | 292           | 63     | 0.47       | 7.8                |
| E2b         | 2    | 2.38                               | 326           | 65     | 0.51       | 8.5                |
| E2b         | 3    | 2.31                               | 339           | 65     | 0.51       | 8.5                |
| E2b         | 4    | 2.34                               | 374           | 65     | 0.57       | 9.3                |
| E2e         | 1    | 2.60                               | 310           | 62     | 0.50       | 8.3                |
| E2e         | 2    | 2.51                               | 308           | 63     | 0.49       | 8.1                |
| E2e         | 3    | 2.78                               | 307           | 62     | 0.53       | 8.8                |
| E2e         | 4    | 2.61                               | 315           | 62     | 0.51       | 8.5                |
| N719        | 1    | 13.87                              | 705           | 62     | 6.02       | 100                |

**Table S4:** Parameters for masked DSCs using electrolytes E2b and E2e over 40 days.

| Electrolyte | Cell | Day | $J_{sc}$<br>[mA cm <sup>-2</sup> ] | $V_{oc}$ [mV] | ff [%] | $\eta$ [%] |
|-------------|------|-----|------------------------------------|---------------|--------|------------|
| E2b         | 1    | 0   | 2.58                               | 292           | 63     | 0.47       |
|             |      | 5   | 2.54                               | 401           | 52     | 0.53       |
|             |      | 14  | 2.19                               | 425           | 58     | 0.54       |
|             |      | 25  | 1.85                               | 446           | 63     | 0.52       |
|             |      | 40  | 1.35                               | 469           | 67     | 0.43       |
| E2b         | 2    | 0   | 2.38                               | 326           | 65     | 0.51       |
|             |      | 5   | 2.32                               | 403           | 60     | 0.56       |
|             |      | 14  | 2.17                               | 421           | 59     | 0.54       |
|             |      | 25  | 2.07                               | 457           | 62     | 0.59       |
|             |      | 40  | 1.73                               | 460           | 64     | 0.51       |
| E2b         | 3    | 0   | 2.34                               | 374           | 65     | 0.57       |
|             |      | 5   | 2.15                               | 428           | 62     | 0.57       |
|             |      | 14  | 2.04                               | 441           | 61     | 0.55       |
|             |      | 25  | 1.88                               | 469           | 64     | 0.57       |
|             |      | 40  | 1.53                               | 470           | 66     | 0.48       |
| E2e         | 1    | 0   | 2.51                               | 308           | 63     | 0.49       |
|             |      | 5   | 2.16                               | 385           | 63     | 0.53       |
|             |      | 14  | 1.95                               | 418           | 65     | 0.53       |
|             |      | 25  | 1.76                               | 436           | 66     | 0.50       |
|             |      | 40  | 1.46                               | 446           | 66     | 0.43       |
| E2e         | 2    | 0   | 2.78                               | 307           | 62     | 0.53       |
|             |      | 5   | 2.17                               | 387           | 61     | 0.52       |
|             |      | 14  | 1.73                               | 435           | 64     | 0.48       |
|             |      | 25  | 1.32                               | 461           | 68     | 0.41       |
|             |      | 40  | 0.90                               | 466           | 71     | 0.29       |
| E2e         | 3    | 0   | 2.61                               | 315           | 62     | 0.51       |
|             |      | 5   | 2.19                               | 379           | 61     | 0.50       |
|             |      | 14  | 1.97                               | 418           | 63     | 0.52       |
|             |      | 25  | 1.70                               | 437           | 65     | 0.48       |
|             |      | 40  | 1.32                               | 446           | 67     | 0.40       |

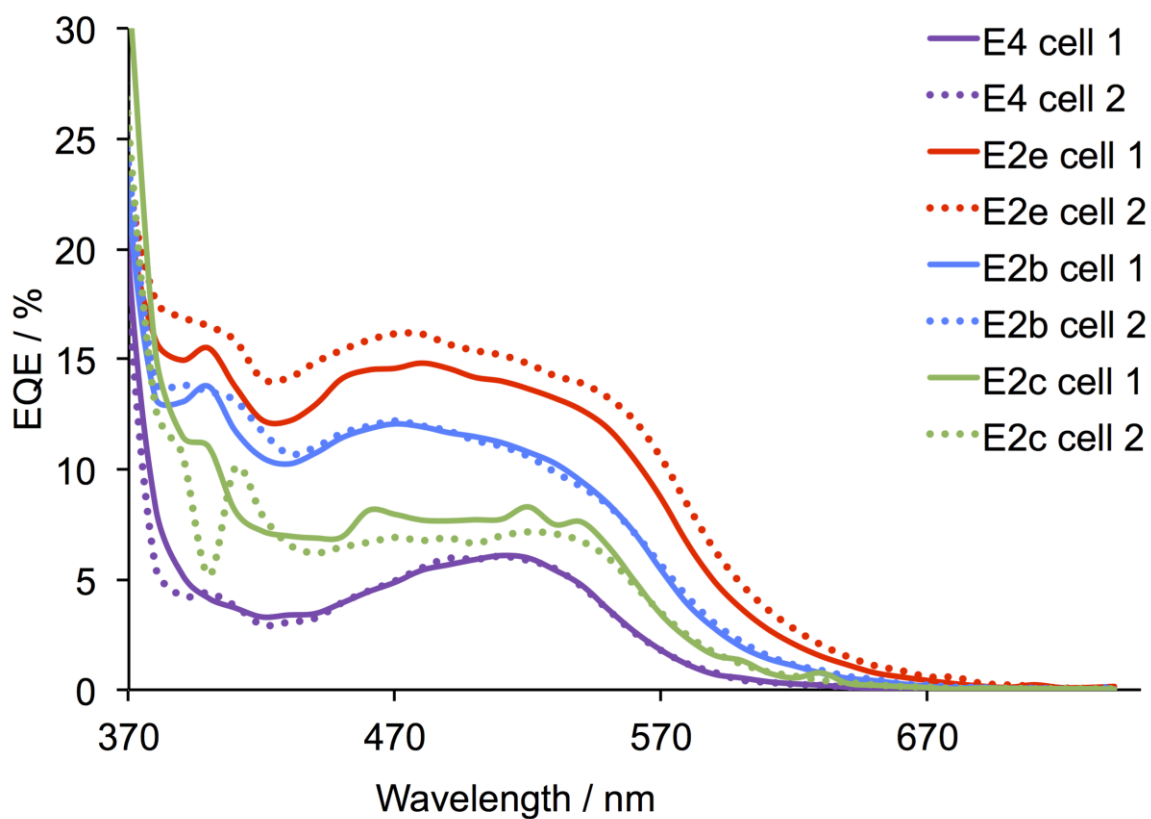

**Figure S1:** EQE spectra for duplicate DSCs with dye 1 and electrolytes E4 and E2b, E2c, E2e recorded on the day of sealing the DSCs.

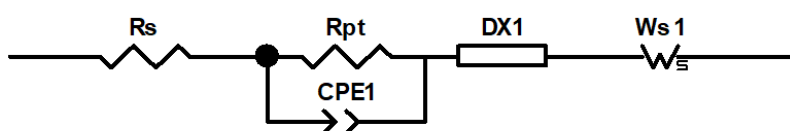

**Figure S2:** Equivalent electric circuit used to model EIS data.

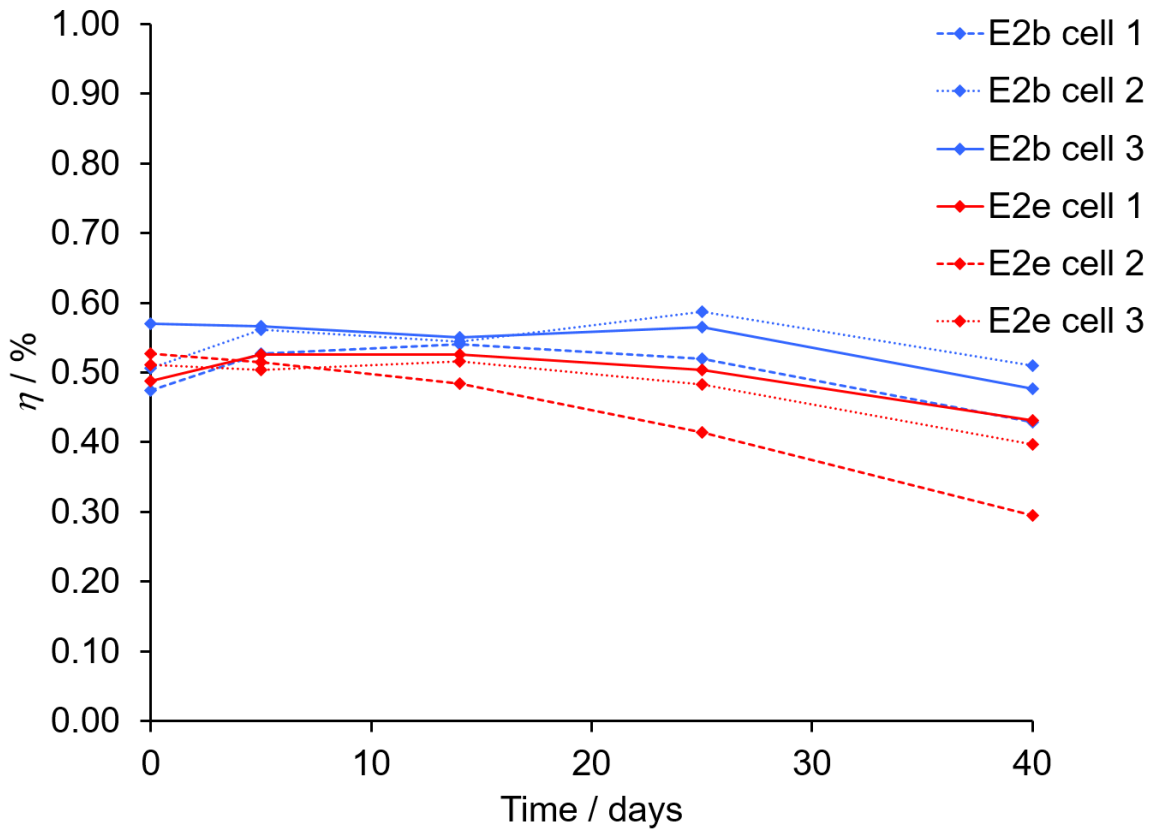

**Figure S3:** Variation in overall DSC efficiencies over a 40 day period for DSCs with electrolytes E2b and E2e.

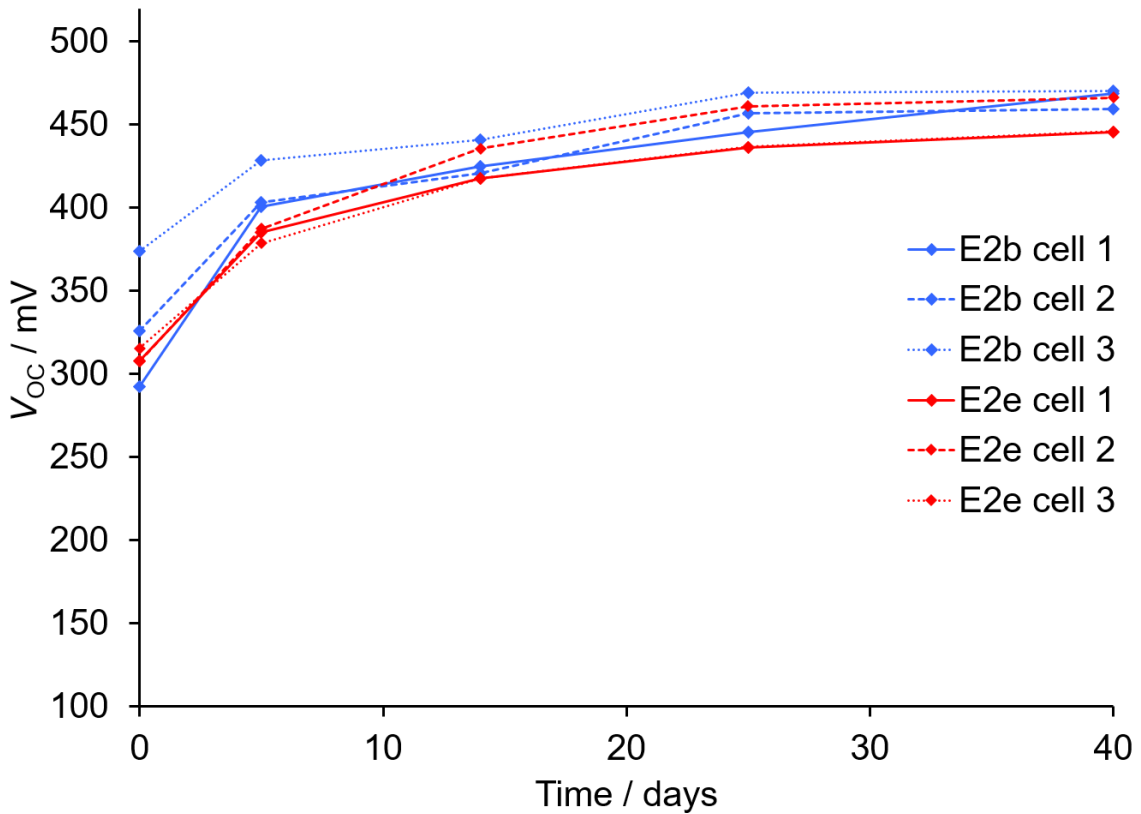

**Figure S4:** Variation in values of  $V_{OC}$  over a 40 day period for DSCs with electrolytes E2b and E2e.

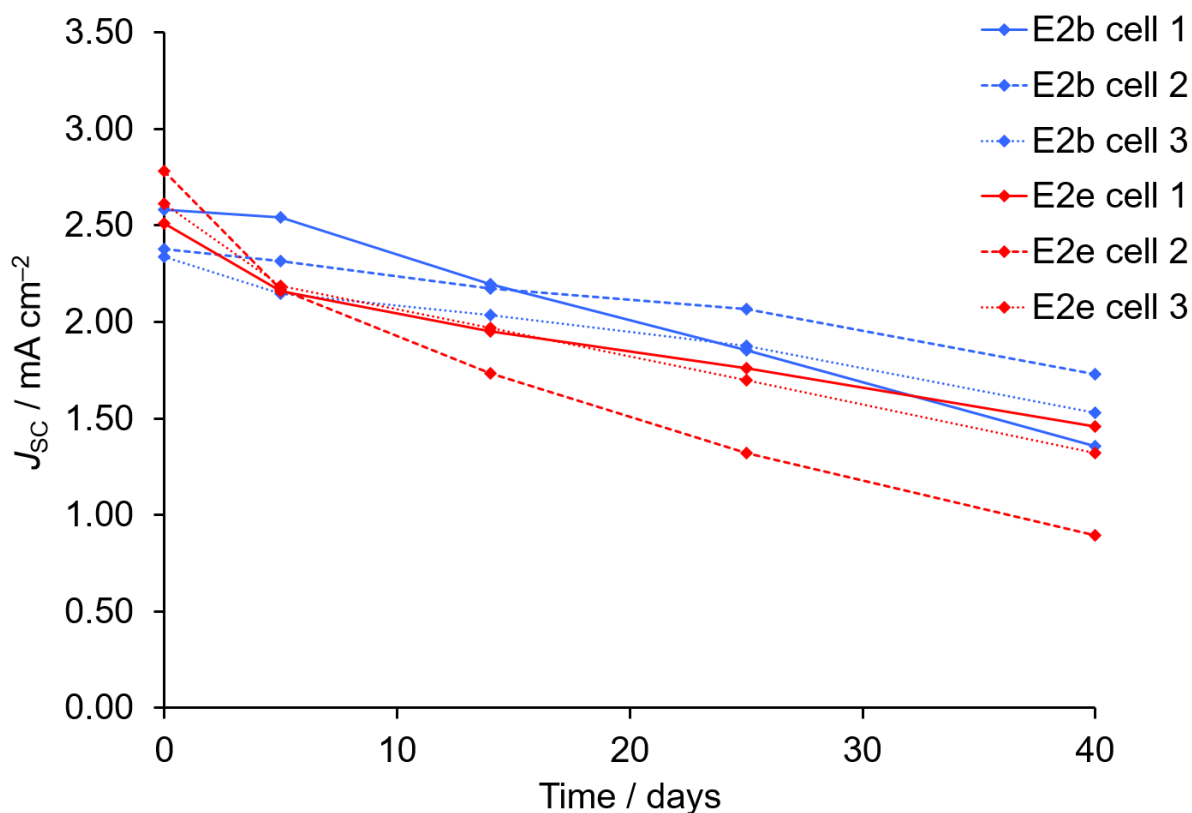

**Figure S5:** Variation in values of  $J_{SC}$  over a 40 day period for DSCs with electrolytes E2b and E2e.

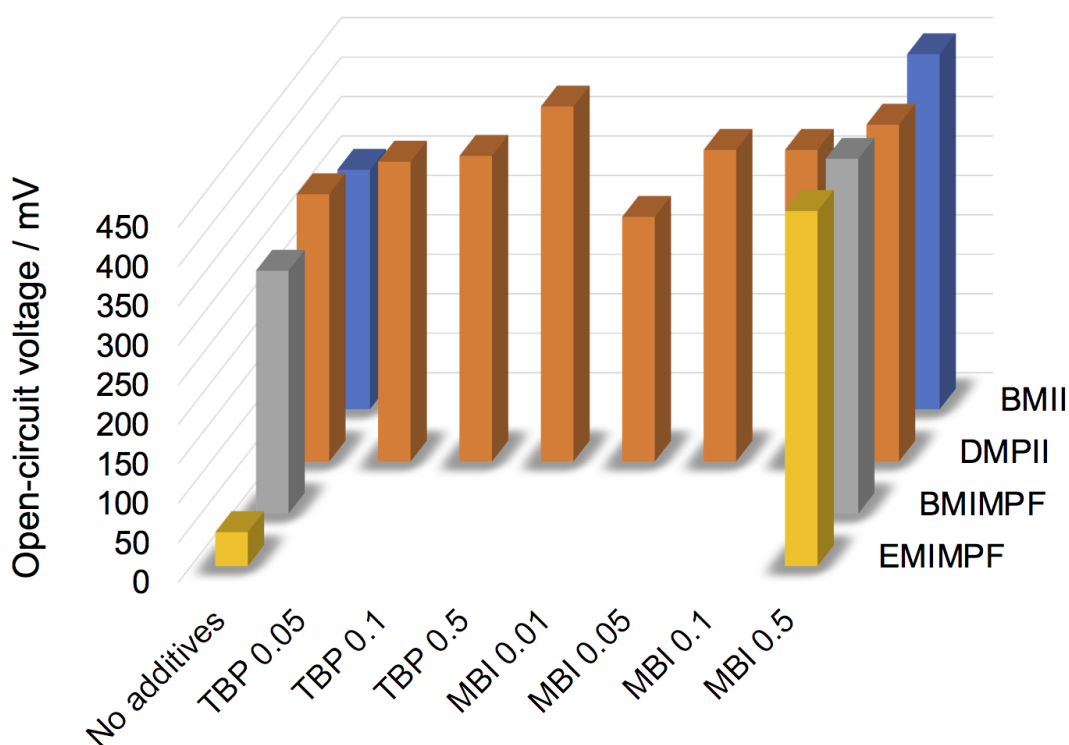

**Figure S6:** The dependence of open-circuit voltage of the DSCs (on day of sealing the cells) on additives (concentrations in M). Electrolyte compositions are LiI (0.1 M, I<sub>2</sub> (0.05 M, ionic liquid (0.6 M) in MPN with additives as specified on the abscissa.
